# Supplementary material for: Transcriptome Profiling of Radish (Raphanus sativus L.) Root and Identification of Genes Involved in Response to Lead (Pb) Stress with Next Generation Sequencing
Source: PLoS One. 2013 Jun 20;8(6):e66539. doi: 10.1371/journal.pone.0066539 (PMC3688795; doi:10.1371/journal.pone.0066539)
Supplement: Table S1 — KEGG pathways of the assembled transcripts. (XLS) [file pone.0066539.s001.xls]

## Sheet: pathway_table
Table S1. KEGG pathways of the assembled transcripts
PathWay	Pathway_definition	number_of_seqs
path:ko01100	Metabolic pathways - Reference pathway (KO)	4269
path:ko01110	Biosynthesis of secondary metabolites - Reference pathway (KO)	1954
path:ko01120	Microbial metabolism in diverse environments - Reference pathway (KO)	1059
path:ko03010	Ribosome - Reference pathway (KO)	839
path:ko04075	Plant hormone signal transduction - Reference pathway (KO)	629
path:ko03040	Spliceosome - Reference pathway (KO)	618
path:ko05016	Huntington's disease - Reference pathway (KO)	519
path:ko04141	Protein processing in endoplasmic reticulum - Reference pathway (KO)	518
path:ko04626	Plant-pathogen interaction - Reference pathway (KO)	495
path:ko03015	mRNA surveillance pathway - Reference pathway (KO)	483
path:ko00190	Oxidative phosphorylation - Reference pathway (KO)	458
path:ko03013	RNA transport - Reference pathway (KO)	434
path:ko05010	Alzheimer's disease - Reference pathway (KO)	420
path:ko00230	Purine metabolism - Reference pathway (KO)	401
path:ko00500	Starch and sucrose metabolism - Reference pathway (KO)	369
path:ko00520	Amino sugar and nucleotide sugar metabolism - Reference pathway (KO)	355
path:ko00010	Glycolysis / Gluconeogenesis - Reference pathway (KO)	348
path:ko04120	Ubiquitin mediated proteolysis - Reference pathway (KO)	344
path:ko04110	Cell cycle - Reference pathway (KO)	324
path:ko05012	Parkinson's disease - Reference pathway (KO)	315
path:ko00240	Pyrimidine metabolism - Reference pathway (KO)	313
path:ko05168	Herpes simplex infection - Reference pathway (KO)	294
path:ko05166	HTLV-I infection - Reference pathway (KO)	291
path:ko03008	Ribosome biogenesis in eukaryotes - Reference pathway (KO)	284
path:ko03018	RNA degradation - Reference pathway (KO)	281
path:ko04144	Endocytosis - Reference pathway (KO)	270
path:ko04114	Oocyte meiosis - Reference pathway (KO)	265
path:ko00564	Glycerophospholipid metabolism - Reference pathway (KO)	258
path:ko04111	Cell cycle - yeast - Reference pathway (KO)	256
path:ko04310	Wnt signaling pathway - Reference pathway (KO)	256
path:ko00680	Methane metabolism - Reference pathway (KO)	230
path:ko00620	Pyruvate metabolism - Reference pathway (KO)	229
path:ko05152	Tuberculosis - Reference pathway (KO)	222
path:ko00270	Cysteine and methionine metabolism - Reference pathway (KO)	222
path:ko00710	Carbon fixation in photosynthetic organisms - Reference pathway (KO)	215
path:ko05164	Influenza A - Reference pathway (KO)	215
path:ko04910	Insulin signaling pathway - Reference pathway (KO)	206
path:ko04142	Lysosome - Reference pathway (KO)	204
path:ko04728	Dopaminergic synapse - Reference pathway (KO)	203
path:ko00020	Citrate cycle (TCA cycle) - Reference pathway (KO)	201
path:ko04145	Phagosome - Reference pathway (KO)	199
path:ko04113	Meiosis - yeast - Reference pathway (KO)	195
path:ko00330	Arginine and proline metabolism - Reference pathway (KO)	193
path:ko03050	Proteasome - Reference pathway (KO)	189
path:ko05200	Pathways in cancer - Reference pathway (KO)	189
path:ko03420	Nucleotide excision repair - Reference pathway (KO)	184
path:ko00940	Phenylpropanoid biosynthesis - Reference pathway (KO)	181
path:ko00910	Nitrogen metabolism - Reference pathway (KO)	181
path:ko00970	Aminoacyl-tRNA biosynthesis - Reference pathway (KO)	179
path:ko04146	Peroxisome - Reference pathway (KO)	176
path:ko00480	Glutathione metabolism - Reference pathway (KO)	163
path:ko00051	Fructose and mannose metabolism - Reference pathway (KO)	158
path:ko05202	Transcriptional misregulation in cancer - Reference pathway (KO)	157
path:ko04070	Phosphatidylinositol signaling system - Reference pathway (KO)	154
path:ko04530	Tight junction - Reference pathway (KO)	154
path:ko00260	Glycine, serine and threonine metabolism - Reference pathway (KO)	151
path:ko04721	Synaptic vesicle cycle - Reference pathway (KO)	150
path:ko00250	Alanine, aspartate and glutamate metabolism - Reference pathway (KO)	149
path:ko04914	Progesterone-mediated oocyte maturation - Reference pathway (KO)	148
path:ko04612	Antigen processing and presentation - Reference pathway (KO)	145
path:ko04720	Long-term potentiation - Reference pathway (KO)	144
path:ko05162	Measles - Reference pathway (KO)	144
path:ko00030	Pentose phosphate pathway - Reference pathway (KO)	144
path:ko05145	Toxoplasmosis - Reference pathway (KO)	143
path:ko00562	Inositol phosphate metabolism - Reference pathway (KO)	142
path:ko00561	Glycerolipid metabolism - Reference pathway (KO)	140
path:ko03460	Fanconi anemia pathway - Reference pathway (KO)	140
path:ko04010	MAPK signaling pathway - Reference pathway (KO)	138
path:ko03022	Basal transcription factors - Reference pathway (KO)	137
path:ko00360	Phenylalanine metabolism - Reference pathway (KO)	135
path:ko04020	Calcium signaling pathway - Reference pathway (KO)	131
path:ko05134	Legionellosis - Reference pathway (KO)	131
path:ko00900	Terpenoid backbone biosynthesis - Reference pathway (KO)	129
path:ko04712	Circadian rhythm - plant - Reference pathway (KO)	129
path:ko03030	DNA replication - Reference pathway (KO)	128
path:ko00510	N-Glycan biosynthesis - Reference pathway (KO)	128
path:ko05110	Vibrio cholerae infection - Reference pathway (KO)	125
path:ko00903	Limonene and pinene degradation - Reference pathway (KO)	122
path:ko04350	TGF-beta signaling pathway - Reference pathway (KO)	122
path:ko00280	Valine, leucine and isoleucine degradation - Reference pathway (KO)	120
path:ko00380	Tryptophan metabolism - Reference pathway (KO)	119
path:ko04520	Adherens junction - Reference pathway (KO)	117
path:ko03060	Protein export - Reference pathway (KO)	115
path:ko00052	Galactose metabolism - Reference pathway (KO)	114
path:ko05215	Prostate cancer - Reference pathway (KO)	113
path:ko04666	Fc gamma R-mediated phagocytosis - Reference pathway (KO)	110
path:ko04810	Regulation of actin cytoskeleton - Reference pathway (KO)	110
path:ko00071	Fatty acid metabolism - Reference pathway (KO)	109
path:ko00630	Glyoxylate and dicarboxylate metabolism - Reference pathway (KO)	109
path:ko03440	Homologous recombination - Reference pathway (KO)	106
path:ko04130	SNARE interactions in vesicular transport - Reference pathway (KO)	106
path:ko00400	Phenylalanine, tyrosine and tryptophan biosynthesis - Reference pathway (KO)	106
path:ko04916	Melanogenesis - Reference pathway (KO)	106
path:ko04115	p53 signaling pathway - Reference pathway (KO)	105
path:ko00945	Stilbenoid, diarylheptanoid and gingerol biosynthesis - Reference pathway (KO)	104
path:ko00040	Pentose and glucuronate interconversions - Reference pathway (KO)	104
path:ko03430	Mismatch repair - Reference pathway (KO)	103
path:ko00627	Aminobenzoate degradation - Reference pathway (KO)	102
path:ko04722	Neurotrophin signaling pathway - Reference pathway (KO)	102
path:ko00906	Carotenoid biosynthesis - Reference pathway (KO)	102
path:ko00563	Glycosylphosphatidylinositol(GPI)-anchor biosynthesis - Reference pathway (KO)	101
path:ko05160	Hepatitis C - Reference pathway (KO)	100
path:ko05211	Renal cell carcinoma - Reference pathway (KO)	100
path:ko03410	Base excision repair - Reference pathway (KO)	99
path:ko00624	Polycyclic aromatic hydrocarbon degradation - Reference pathway (KO)	99
path:ko05142	Chagas disease (American trypanosomiasis) - Reference pathway (KO)	99
path:ko05120	Epithelial cell signaling in Helicobacter pylori infection - Reference pathway (KO)	99
path:ko04724	Glutamatergic synapse - Reference pathway (KO)	99
path:ko00290	Valine, leucine and isoleucine biosynthesis - Reference pathway (KO)	98
path:ko00513	Various types of N-glycan biosynthesis - Reference pathway (KO)	97
path:ko00130	Ubiquinone and other terpenoid-quinone biosynthesis - Reference pathway (KO)	97
path:ko05323	Rheumatoid arthritis - Reference pathway (KO)	97
path:ko00640	Propanoate metabolism - Reference pathway (KO)	97
path:ko02020	Two-component system - Reference pathway (KO)	96
path:ko05322	Systemic lupus erythematosus - Reference pathway (KO)	95
path:ko00720	Carbon fixation pathways in prokaryotes - Reference pathway (KO)	93
path:ko00920	Sulfur metabolism - Reference pathway (KO)	93
path:ko01040	Biosynthesis of unsaturated fatty acids - Reference pathway (KO)	89
path:ko04260	Cardiac muscle contraction - Reference pathway (KO)	89
path:ko04912	GnRH signaling pathway - Reference pathway (KO)	89
path:ko04966	Collecting duct acid secretion - Reference pathway (KO)	88
path:ko00650	Butanoate metabolism - Reference pathway (KO)	87
path:ko00460	Cyanoamino acid metabolism - Reference pathway (KO)	87
path:ko00770	Pantothenate and CoA biosynthesis - Reference pathway (KO)	85
path:ko03020	RNA polymerase - Reference pathway (KO)	84
path:ko00363	Bisphenol degradation - Reference pathway (KO)	84
path:ko00410	beta-Alanine metabolism - Reference pathway (KO)	80
path:ko00310	Lysine degradation - Reference pathway (KO)	79
path:ko05031	Amphetamine addiction - Reference pathway (KO)	78
path:ko00565	Ether lipid metabolism - Reference pathway (KO)	78
path:ko04930	Type II diabetes mellitus - Reference pathway (KO)	75
path:ko04140	Regulation of autophagy - Reference pathway (KO)	75
path:ko00760	Nicotinate and nicotinamide metabolism - Reference pathway (KO)	73
path:ko04330	Notch signaling pathway - Reference pathway (KO)	72
path:ko04976	Bile secretion - Reference pathway (KO)	70
path:ko00860	Porphyrin and chlorophyll metabolism - Reference pathway (KO)	70
path:ko04270	Vascular smooth muscle contraction - Reference pathway (KO)	68
path:ko04150	mTOR signaling pathway - Reference pathway (KO)	68
path:ko00195	Photosynthesis - Reference pathway (KO)	68
path:ko03320	PPAR signaling pathway - Reference pathway (KO)	68
path:ko00983	Drug metabolism - other enzymes - Reference pathway (KO)	67
path:ko00061	Fatty acid biosynthesis - Reference pathway (KO)	67
path:ko04920	Adipocytokine signaling pathway - Reference pathway (KO)	66
path:ko05130	Pathogenic Escherichia coli infection - Reference pathway (KO)	66
path:ko00982	Drug metabolism - cytochrome P450 - Reference pathway (KO)	65
path:ko00980	Metabolism of xenobiotics by cytochrome P450 - Reference pathway (KO)	64
path:ko00670	One carbon pool by folate - Reference pathway (KO)	63
path:ko04727	GABAergic synapse - Reference pathway (KO)	62
path:ko04510	Focal adhesion - Reference pathway (KO)	61
path:ko00100	Steroid biosynthesis - Reference pathway (KO)	60
path:ko00592	alpha-Linolenic acid metabolism - Reference pathway (KO)	59
path:ko05132	Salmonella infection - Reference pathway (KO)	58
path:ko00053	Ascorbate and aldarate metabolism - Reference pathway (KO)	57
path:ko05014	Amyotrophic lateral sclerosis (ALS) - Reference pathway (KO)	57
path:ko05133	Pertussis - Reference pathway (KO)	57
path:ko04730	Long-term depression - Reference pathway (KO)	56
path:ko00450	Selenocompound metabolism - Reference pathway (KO)	55
path:ko00350	Tyrosine metabolism - Reference pathway (KO)	55
path:ko02010	ABC transporters - Reference pathway (KO)	55
path:ko01053	Biosynthesis of siderophore group nonribosomal peptides - Reference pathway (KO)	55
path:ko05214	Glioma - Reference pathway (KO)	54
path:ko04630	Jak-STAT signaling pathway - Reference pathway (KO)	54
path:ko05131	Shigellosis - Reference pathway (KO)	53
path:ko04370	VEGF signaling pathway - Reference pathway (KO)	52
path:ko00340	Histidine metabolism - Reference pathway (KO)	52
path:ko04360	Axon guidance - Reference pathway (KO)	52
path:ko00600	Sphingolipid metabolism - Reference pathway (KO)	50
path:ko00521	Streptomycin biosynthesis - Reference pathway (KO)	50
path:ko00603	Glycosphingolipid biosynthesis - globo series - Reference pathway (KO)	47
path:ko04662	B cell receptor signaling pathway - Reference pathway (KO)	46
path:ko05100	Bacterial invasion of epithelial cells - Reference pathway (KO)	46
path:ko04621	NOD-like receptor signaling pathway - Reference pathway (KO)	45
path:ko00790	Folate biosynthesis - Reference pathway (KO)	44
path:ko04540	Gap junction - Reference pathway (KO)	44
path:ko04744	Phototransduction - Reference pathway (KO)	44
path:ko04660	T cell receptor signaling pathway - Reference pathway (KO)	43
path:ko04210	Apoptosis - Reference pathway (KO)	43
path:ko00430	Taurine and hypotaurine metabolism - Reference pathway (KO)	41
path:ko00300	Lysine biosynthesis - Reference pathway (KO)	41
path:ko00960	Tropane, piperidine and pyridine alkaloid biosynthesis - Reference pathway (KO)	41
path:ko04650	Natural killer cell mediated cytotoxicity - Reference pathway (KO)	41
path:ko04745	Phototransduction - fly - Reference pathway (KO)	40
path:ko00590	Arachidonic acid metabolism - Reference pathway (KO)	40
path:ko00941	Flavonoid biosynthesis - Reference pathway (KO)	40
path:ko05210	Colorectal cancer - Reference pathway (KO)	39
path:ko04340	Hedgehog signaling pathway - Reference pathway (KO)	37
path:ko05020	Prion diseases - Reference pathway (KO)	36
path:ko00966	Glucosinolate biosynthesis - Reference pathway (KO)	36
path:ko04062	Chemokine signaling pathway - Reference pathway (KO)	35
path:ko00908	Zeatin biosynthesis - Reference pathway (KO)	35
path:ko04740	Olfactory transduction - Reference pathway (KO)	34
path:ko04970	Salivary secretion - Reference pathway (KO)	34
path:ko00062	Fatty acid elongation - Reference pathway (KO)	34
path:ko00625	Chloroalkane and chloroalkene degradation - Reference pathway (KO)	34
path:ko04971	Gastric acid secretion - Reference pathway (KO)	34
path:ko00511	Other glycan degradation - Reference pathway (KO)	33
path:ko05416	Viral myocarditis - Reference pathway (KO)	33
path:ko00909	Sesquiterpenoid and triterpenoid biosynthesis - Reference pathway (KO)	32
path:ko04978	Mineral absorption - Reference pathway (KO)	32
path:ko04973	Carbohydrate digestion and absorption - Reference pathway (KO)	31
path:ko04723	Retrograde endocannabinoid signaling - Reference pathway (KO)	31
path:ko04623	Cytosolic DNA-sensing pathway - Reference pathway (KO)	31
path:ko04710	Circadian rhythm - mammal - Reference pathway (KO)	31
path:ko04961	Endocrine and other factor-regulated calcium reabsorption - Reference pathway (KO)	31
path:ko04112	Cell cycle - Caulobacter - Reference pathway (KO)	30
path:ko00362	Benzoate degradation - Reference pathway (KO)	29
path:ko03070	Bacterial secretion system - Reference pathway (KO)	29
path:ko04622	RIG-I-like receptor signaling pathway - Reference pathway (KO)	28
path:ko05213	Endometrial cancer - Reference pathway (KO)	28
path:ko04726	Serotonergic synapse - Reference pathway (KO)	28
path:ko00524	Butirosin and neomycin biosynthesis - Reference pathway (KO)	28
path:ko00531	Glycosaminoglycan degradation - Reference pathway (KO)	26
path:ko00950	Isoquinoline alkaloid biosynthesis - Reference pathway (KO)	26
path:ko00591	Linoleic acid metabolism - Reference pathway (KO)	25
path:ko00660	C5-Branched dibasic acid metabolism - Reference pathway (KO)	25
path:ko05410	Hypertrophic cardiomyopathy (HCM) - Reference pathway (KO)	25
path:ko00740	Riboflavin metabolism - Reference pathway (KO)	25
path:ko00196	Photosynthesis - antenna proteins - Reference pathway (KO)	25
path:ko05222	Small cell lung cancer - Reference pathway (KO)	24
path:ko04725	Cholinergic synapse - Reference pathway (KO)	24
path:ko04620	Toll-like receptor signaling pathway - Reference pathway (KO)	24
path:ko04012	ErbB signaling pathway - Reference pathway (KO)	24
path:ko05212	Pancreatic cancer - Reference pathway (KO)	24
path:ko00830	Retinol metabolism - Reference pathway (KO)	23
path:ko04011	MAPK signaling pathway - yeast - Reference pathway (KO)	22
path:ko00750	Vitamin B6 metabolism - Reference pathway (KO)	22
path:ko04614	Renin-angiotensin system - Reference pathway (KO)	22
path:ko04122	Sulfur relay system - Reference pathway (KO)	22
path:ko04940	Type I diabetes mellitus - Reference pathway (KO)	21
path:ko00904	Diterpenoid biosynthesis - Reference pathway (KO)	21
path:ko00626	Naphthalene degradation - Reference pathway (KO)	21
path:ko04964	Proximal tubule bicarbonate reclamation - Reference pathway (KO)	21
path:ko00604	Glycosphingolipid biosynthesis - ganglio series - Reference pathway (KO)	21
path:ko05032	Morphine addiction - Reference pathway (KO)	21
path:ko04664	Fc epsilon RI signaling pathway - Reference pathway (KO)	20
path:ko00072	Synthesis and degradation of ketone bodies - Reference pathway (KO)	20
path:ko00540	Lipopolysaccharide biosynthesis - Reference pathway (KO)	20
path:ko05216	Thyroid cancer - Reference pathway (KO)	20
path:ko00730	Thiamine metabolism - Reference pathway (KO)	20
path:ko00073	Cutin, suberine and wax biosynthesis - Reference pathway (KO)	20
path:ko05218	Melanoma - Reference pathway (KO)	19
path:ko04380	Osteoclast differentiation - Reference pathway (KO)	19
path:ko05221	Acute myeloid leukemia - Reference pathway (KO)	19
path:ko05220	Chronic myeloid leukemia - Reference pathway (KO)	18
path:ko00440	Phosphonate and phosphinate metabolism - Reference pathway (KO)	18
path:ko04975	Fat digestion and absorption - Reference pathway (KO)	18
path:ko05140	Leishmaniasis - Reference pathway (KO)	18
path:ko04972	Pancreatic secretion - Reference pathway (KO)	17
path:ko05223	Non-small cell lung cancer - Reference pathway (KO)	16
path:ko04711	Circadian rhythm - fly - Reference pathway (KO)	16
path:ko04670	Leukocyte transendothelial migration - Reference pathway (KO)	16
path:ko00361	Chlorocyclohexane and chlorobenzene degradation - Reference pathway (KO)	15
path:ko00905	Brassinosteroid biosynthesis - Reference pathway (KO)	14
path:ko04320	Dorso-ventral axis formation - Reference pathway (KO)	13
path:ko04742	Taste transduction - Reference pathway (KO)	12
path:ko04013	MAPK signaling pathway - fly - Reference pathway (KO)	12
path:ko03450	Non-homologous end-joining - Reference pathway (KO)	12
path:ko00351	DDT degradation - Reference pathway (KO)	12
path:ko00902	Monoterpenoid biosynthesis - Reference pathway (KO)	12
path:ko00281	Geraniol degradation - Reference pathway (KO)	12
path:ko05219	Bladder cancer - Reference pathway (KO)	12
path:ko04962	Vasopressin-regulated water reabsorption - Reference pathway (KO)	11
path:ko05146	Amoebiasis - Reference pathway (KO)	11
path:ko00514	Other types of O-glycan biosynthesis - Reference pathway (KO)	10
path:ko04974	Protein digestion and absorption - Reference pathway (KO)	10
path:ko01051	Biosynthesis of ansamycins - Reference pathway (KO)	10
path:ko00253	Tetracycline biosynthesis - Reference pathway (KO)	10
path:ko00471	D-Glutamine and D-glutamate metabolism - Reference pathway (KO)	10
path:ko04960	Aldosterone-regulated sodium reabsorption - Reference pathway (KO)	10
path:ko00785	Lipoic acid metabolism - Reference pathway (KO)	9
path:ko00901	Indole alkaloid biosynthesis - Reference pathway (KO)	9
path:ko00643	Styrene degradation - Reference pathway (KO)	8
path:ko05414	Dilated cardiomyopathy - Reference pathway (KO)	8
path:ko05412	Arrhythmogenic right ventricular cardiomyopathy (ARVC) - Reference pathway (KO)	8
path:ko00930	Caprolactam degradation - Reference pathway (KO)	7
path:ko00780	Biotin metabolism - Reference pathway (KO)	7
path:ko00965	Betalain biosynthesis - Reference pathway (KO)	6
path:ko05217	Basal cell carcinoma - Reference pathway (KO)	6
path:ko00944	Flavone and flavonol biosynthesis - Reference pathway (KO)	6
path:ko00232	Caffeine metabolism - Reference pathway (KO)	6
path:ko00550	Peptidoglycan biosynthesis - Reference pathway (KO)	5
path:ko05143	African trypanosomiasis - Reference pathway (KO)	5
path:ko04977	Vitamin digestion and absorption - Reference pathway (KO)	4
path:ko00401	Novobiocin biosynthesis - Reference pathway (KO)	4
path:ko05340	Primary immunodeficiency - Reference pathway (KO)	4
path:ko00523	Polyketide sugar unit biosynthesis - Reference pathway (KO)	3
path:ko00623	Toluene degradation - Reference pathway (KO)	3
path:ko00364	Fluorobenzoate degradation - Reference pathway (KO)	3
path:ko05111	Vibrio cholerae pathogenic cycle - Reference pathway (KO)	2
path:ko00621	Dioxin degradation - Reference pathway (KO)	2
path:ko05030	Cocaine addiction - Reference pathway (KO)	1
path:ko00472	D-Arginine and D-ornithine metabolism - Reference pathway (KO)	1
path:ko00942	Anthocyanin biosynthesis - Reference pathway (KO)	1
path:ko00642	Ethylbenzene degradation - Reference pathway (KO)	1
path:ko00311	Penicillin and cephalosporin biosynthesis - Reference pathway (KO)	1
path:ko00120	Primary bile acid biosynthesis - Reference pathway (KO)	1
