# Supplementary material for: Transcriptome Profiling of Radish (Raphanus sativus L.) Root and Identification of Genes Involved in Response to Lead (Pb) Stress with Next Generation Sequencing
Source: PLoS One. 2013 Jun 20;8(6):e66539. doi: 10.1371/journal.pone.0066539 (PMC3688795; doi:10.1371/journal.pone.0066539)
Supplement: Table S3 — The enriched GO terms of down-regulated DEGs. (XLS) [file pone.0066539.s003.xls]

## Sheet: pb-1000_vs_CK down
Table S3.The enriched GO terms of down-regulated DEGs
id	enrichment	description	ratio_in_study	ratio_in_pop	p_uncorrected	p_bonferroni	p_holm	p_sidak	p_fdr
GO:0016761	e	cellulose synthase (GDP-forming) activity	11/2460	15/68940	8.38e-12	2.98e-08	2.98e-08	2.9e-08	0
GO:0016837	e	carbon-oxygen lyase activity, acting on polysaccharides	21/2460	39/68940	3.41e-11	1.21e-07	1.21e-07	1.18e-07	0
GO:0030570	e	pectate lyase activity	21/2460	39/68940	3.41e-11	1.21e-07	1.21e-07	1.18e-07	0
GO:0007047	e	cellular cell wall organization	42/2460	253/68940	4.1e-11	1.46e-07	1.45e-07	1.42e-07	0
GO:0042545	e	cell wall modification	35/2460	267/68940	4.32e-11	1.53e-07	1.53e-07	1.5e-07	0
GO:0031225	e	anchored to membrane	55/2460	352/68940	4.35e-11	1.55e-07	1.54e-07	1.51e-07	0
GO:0009834	e	secondary cell wall biogenesis	34/2460	100/68940	5.01e-11	1.78e-07	1.78e-07	1.74e-07	0
GO:0031226	e	intrinsic to plasma membrane	35/2460	256/68940	5.67e-11	2.02e-07	2.01e-07	1.97e-07	0
GO:0070882	e	cellular cell wall organization or biogenesis	85/2460	542/68940	5.82e-11	2.07e-07	2.06e-07	2.02e-07	0
GO:0010383	e	cell wall polysaccharide metabolic process	25/2460	122/68940	6.27e-11	2.23e-07	2.22e-07	2.17e-07	0
GO:0007018	e	microtubule-based movement	33/2460	246/68940	8.26e-11	2.93e-07	2.93e-07	2.86e-07	0
GO:0030244	e	cellulose biosynthetic process	32/2460	207/68940	8.58e-11	3.05e-07	3.04e-07	2.97e-07	0
GO:0071555	e	cell wall organization	60/2460	436/68940	8.7e-11	3.09e-07	3.08e-07	3.01e-07	0
GO:0071554	e	cell wall organization or biogenesis	96/2460	717/68940	9.16e-11	3.26e-07	3.24e-07	3.17e-07	0
GO:0007017	e	microtubule-based process	48/2460	469/68940	9.79e-11	3.48e-07	3.47e-07	3.39e-07	0
GO:0045229	e	external encapsulating structure organization	44/2460	289/68940	9.91e-11	3.52e-07	3.51e-07	3.43e-07	0
GO:0042546	e	cell wall biogenesis	52/2460	289/68940	9.91e-11	3.52e-07	3.51e-07	3.43e-07	0
GO:0005984	e	disaccharide metabolic process	105/2460	987/68940	1.09e-10	3.88e-07	3.87e-07	3.79e-07	0
GO:0046658	e	anchored to plasma membrane	28/2460	160/68940	1.17e-10	4.16e-07	4.14e-07	4.06e-07	0
GO:0071669	e	plant-type cell wall organization or biogenesis	65/2460	334/68940	1.19e-10	4.23e-07	4.2e-07	4.12e-07	0
GO:0005874	e	microtubule	46/2460	394/68940	1.21e-10	4.31e-07	4.28e-07	4.2e-07	0
GO:0016798	e	hydrolase activity, acting on glycosyl bonds	86/2460	820/68940	1.24e-10	4.42e-07	4.39e-07	4.31e-07	0
GO:0009832	e	plant-type cell wall biogenesis	50/2460	250/68940	1.27e-10	4.52e-07	4.49e-07	4.4e-07	0
GO:0016137	e	glycoside metabolic process	121/2460	1192/68940	1.35e-10	4.81e-07	4.78e-07	4.69e-07	0
GO:0044264	e	cellular polysaccharide metabolic process	132/2460	1252/68940	1.37e-10	4.88e-07	4.85e-07	4.76e-07	0
GO:0030243	e	cellulose metabolic process	32/2460	225/68940	1.54e-10	5.49e-07	5.45e-07	5.35e-07	0
GO:0005794	e	Golgi apparatus	63/2460	691/68940	1.54e-10	5.49e-07	5.45e-07	5.35e-07	0
GO:0005985	e	sucrose metabolic process	103/2460	976/68940	1.56e-10	5.54e-07	5.5e-07	5.4e-07	0
GO:0009505	e	plant-type cell wall	79/2460	673/68940	1.59e-10	5.64e-07	5.6e-07	5.5e-07	0
GO:0005982	e	starch metabolic process	107/2460	1002/68940	1.61e-10	5.74e-07	5.69e-07	5.59e-07	0
GO:0044042	e	glucan metabolic process	124/2460	1146/68940	1.74e-10	6.18e-07	6.13e-07	6.02e-07	0
GO:0005976	e	polysaccharide metabolic process	146/2460	1457/68940	1.85e-10	6.57e-07	6.51e-07	6.41e-07	0
GO:0008194	e	UDP-glycosyltransferase activity	66/2460	764/68940	1.92e-10	6.82e-07	6.76e-07	6.64e-07	0
GO:0016758	e	transferase activity, transferring hexosyl groups	82/2460	1017/68940	2.08e-10	7.39e-07	7.32e-07	7.2e-07	0
GO:0004553	e	hydrolase activity, hydrolyzing O-glycosyl compounds	83/2460	722/68940	2.14e-10	7.62e-07	7.55e-07	7.43e-07	0
GO:0006073	e	cellular glucan metabolic process	122/2460	1130/68940	2.16e-10	7.69e-07	7.62e-07	7.5e-07	0
GO:0030312	e	external encapsulating structure	145/2460	1646/68940	2.45e-10	8.72e-07	8.63e-07	8.5e-07	0
GO:0005618	e	cell wall	145/2460	1646/68940	2.45e-10	8.72e-07	8.63e-07	8.5e-07	0
GO:0009311	e	oligosaccharide metabolic process	106/2460	1053/68940	2.56e-10	9.11e-07	9.01e-07	8.88e-07	0
GO:0005975	e	carbohydrate metabolic process	224/2460	3038/68940	3.16e-10	1.12e-06	1.11e-06	1.09e-06	0
GO:0044262	e	cellular carbohydrate metabolic process	192/2460	2527/68940	3.39e-10	1.21e-06	1.19e-06	1.18e-06	0
GO:0044425	e	membrane part	307/2460	5425/68940	3.44e-10	1.22e-06	1.21e-06	1.19e-06	0
GO:0031224	e	intrinsic to membrane	246/2460	3997/68940	3.61e-10	1.28e-06	1.27e-06	1.25e-06	0
GO:0005886	e	plasma membrane	348/2460	6462/68940	3.97e-10	1.41e-06	1.39e-06	1.38e-06	0
GO:0016051	e	carbohydrate biosynthetic process	97/2460	1356/68940	4.66e-10	1.66e-06	1.63e-06	1.61e-06	0
GO:0016020	e	membrane	532/2460	11079/68940	6e-10	2.13e-06	2.1e-06	2.08e-06	0
GO:0005575	e	cellular_component	1480/2460	35017/68940	6.94e-10	2.47e-06	2.43e-06	2.4e-06	0
GO:0003674	e	molecular_function	1588/2460	39812/68940	7.34e-10	2.61e-06	2.57e-06	2.54e-06	0
GO:0034637	e	cellular carbohydrate biosynthetic process	82/2460	1106/68940	7.71e-10	2.74e-06	2.7e-06	2.67e-06	0
GO:0008150	e	biological_process	1480/2460	36655/68940	8.37e-10	2.97e-06	2.93e-06	2.9e-06	0
GO:0033692	e	cellular polysaccharide biosynthetic process	47/2460	487/68940	1.06e-09	3.76e-06	3.71e-06	3.67e-06	0
GO:0009506	e	plasmodesma	199/2460	3585/68940	1.14e-09	4.06e-06	4.01e-06	3.96e-06	0
GO:0016021	e	integral to membrane	194/2460	3474/68940	1.15e-09	4.1e-06	4.04e-06	3.99e-06	0
GO:0005911	e	cell-cell junction	199/2460	3590/68940	1.16e-09	4.12e-06	4.05e-06	4.01e-06	0
GO:0030054	e	cell junction	199/2460	3601/68940	1.23e-09	4.38e-06	4.31e-06	4.27e-06	0
GO:0045491	e	xylan metabolic process	18/2460	86/68940	1.25e-09	4.44e-06	4.37e-06	4.33e-06	0
GO:0071840	e	cellular component organization or biogenesis	256/2460	4919/68940	1.48e-09	5.26e-06	5.18e-06	5.13e-06	0
GO:0044036	e	cell wall macromolecule metabolic process	30/2460	233/68940	1.57e-09	5.6e-06	5.51e-06	5.46e-06	0
GO:0010395	e	rhamnogalacturonan I metabolic process	6/2460	6/68940	2.05e-09	7.29e-06	7.17e-06	7.11e-06	0
GO:0010400	e	rhamnogalacturonan I side chain metabolic process	6/2460	6/68940	2.05e-09	7.29e-06	7.17e-06	7.11e-06	0
GO:0016760	e	cellulose synthase (UDP-forming) activity	21/2460	122/68940	2.37e-09	8.44e-06	8.29e-06	8.22e-06	0
GO:0010410	e	hemicellulose metabolic process	18/2460	90/68940	2.71e-09	9.63e-06	9.46e-06	9.38e-06	0
GO:0006011	e	UDP-glucose metabolic process	21/2460	123/68940	2.77e-09	9.83e-06	9.66e-06	9.58e-06	0
GO:0016757	e	transferase activity, transferring glycosyl groups	89/2460	1285/68940	4.85e-09	1.72e-05	1.69e-05	1.68e-05	0
GO:0016043	e	cellular component organization	200/2460	3704/68940	6.41e-09	2.28e-05	2.24e-05	2.22e-05	0
GO:0009987	e	cellular process	1071/2460	26134/68940	6.48e-09	2.3e-05	2.26e-05	2.24e-05	0
GO:0008810	e	cellulase activity	12/2460	41/68940	1.25e-08	4.45e-05	4.36e-05	4.33e-05	0
GO:0010382	e	cellular cell wall macromolecule metabolic process	20/2460	122/68940	1.35e-08	4.78e-05	4.69e-05	4.66e-05	0
GO:0035251	e	UDP-glucosyltransferase activity	40/2460	411/68940	1.41e-08	5.02e-05	4.93e-05	4.9e-05	0
GO:0006928	e	cellular component movement	34/2460	316/68940	1.44e-08	5.12e-05	5.02e-05	4.99e-05	0
GO:0000271	e	polysaccharide biosynthetic process	50/2460	581/68940	1.5e-08	5.31e-05	5.21e-05	5.18e-05	0
GO:0071841	e	cellular component organization or biogenesis at cellular level	211/2460	3997/68940	1.63e-08	5.81e-05	5.69e-05	5.66e-05	0
GO:0009250	e	glucan biosynthetic process	36/2460	349/68940	1.66e-08	5.89e-05	5.77e-05	5.74e-05	0
GO:0016759	e	cellulose synthase activity	23/2460	161/68940	1.71e-08	6.08e-05	5.95e-05	5.92e-05	0
GO:0005576	e	extracellular region	71/2460	977/68940	2.6e-08	9.23e-05	9.04e-05	9e-05	0
GO:0003824	e	catalytic activity	902/2460	21742/68940	3.67e-08	0.00013	0.000128	0.000127	0
GO:0007169	e	transmembrane receptor protein tyrosine kinase signaling pathway	39/2460	409/68940	3.69e-08	0.000131	0.000128	0.000128	0
GO:0044430	e	cytoskeletal part	55/2460	691/68940	4.43e-08	0.000158	0.000154	0.000154	0
GO:0071577	e	zinc ion transmembrane transport	9/2460	23/68940	4.8e-08	0.000171	0.000167	0.000166	0
GO:0009225	e	nucleotide-sugar metabolic process	28/2460	241/68940	5.17e-08	0.000184	0.00018	0.000179	0
GO:0009827	e	plant-type cell wall modification	15/2460	77/68940	8.12e-08	0.000289	0.000282	0.000281	0
GO:0042547	e	cell wall modification involved in multidimensional cell growth	11/2460	40/68940	1.04e-07	0.000369	0.00036	0.000359	0
GO:0046527	e	glucosyltransferase activity	42/2460	471/68940	1.1e-07	0.000389	0.00038	0.00038	0
GO:0005385	e	zinc ion transmembrane transporter activity	12/2460	50/68940	1.43e-07	0.000507	0.000495	0.000494	0
GO:0006829	e	zinc ion transport	12/2460	52/68940	2.27e-07	0.000807	0.000788	0.000787	0
GO:0005507	e	copper ion binding	45/2460	542/68940	2.6e-07	0.000924	0.000902	0.0009	0
GO:0007167	e	enzyme linked receptor protein signaling pathway	54/2460	712/68940	3.73e-07	0.00133	0.00129	0.00129	0
GO:0044459	e	plasma membrane part	50/2460	643/68940	4.95e-07	0.00176	0.00171	0.00171	0
GO:0008447	e	L-ascorbate oxidase activity	11/2460	47/68940	6.21e-07	0.00221	0.00215	0.00215	0
GO:0006949	e	syncytium formation	9/2460	30/68940	6.7e-07	0.00238	0.00232	0.00232	0
GO:0009664	e	plant-type cell wall organization	15/2460	90/68940	6.82e-07	0.00242	0.00236	0.00236	0
GO:0050896	e	response to stimulus	592/2460	13831/68940	8.33e-07	0.00296	0.00288	0.00289	0
GO:0004650	e	polygalacturonase activity	13/2460	69/68940	8.8e-07	0.00313	0.00305	0.00305	0
GO:0045492	e	xylan biosynthetic process	9/2460	31/68940	9.14e-07	0.00325	0.00316	0.00317	0
GO:0044464	e	cell part	1162/2460	29239/68940	9.32e-07	0.00331	0.00323	0.00323	0
GO:0070592	e	cell wall polysaccharide biosynthetic process	10/2460	40/68940	1.04e-06	0.00371	0.00361	0.00362	0
GO:0055070	e	copper ion homeostasis	10/2460	41/68940	1.34e-06	0.00475	0.00462	0.00463	0
GO:0003777	e	microtubule motor activity	25/2460	242/68940	2.33e-06	0.00829	0.00806	0.00808	0.003
GO:0048646	e	anatomical structure formation involved in morphogenesis	27/2460	283/68940	4.28e-06	0.0152	0.0148	0.0148	0.006
GO:0007166	e	cell surface receptor signaling pathway	57/2460	838/68940	5.11e-06	0.0182	0.0177	0.0177	0.006
GO:0016682	e	oxidoreductase activity, acting on diphenols and related substances as donors, oxygen as acceptor	12/2460	71/68940	7.53e-06	0.0268	0.026	0.0261	0.007
GO:0052546	e	cell wall pectin metabolic process	7/2460	22/68940	7.77e-06	0.0276	0.0268	0.0269	0.007
GO:0006878	e	cellular copper ion homeostasis	8/2460	31/68940	9.83e-06	0.0349	0.0339	0.034	0.012
GO:0070838	e	divalent metal ion transport	20/2460	183/68940	1e-05	0.0355	0.0345	0.0346	0.012
GO:0006066	e	alcohol metabolic process	80/2460	1346/68940	1.08e-05	0.0383	0.0372	0.0373	0.013
GO:0005773	e	vacuole	73/2460	1199/68940	1.32e-05	0.0471	0.0457	0.0459	0.019
GO:0051258	e	protein polymerization	12/2460	75/68940	1.35e-05	0.0479	0.0464	0.0467	0.019
