# Supplementary material for: Transcriptome Profiling of Radish (Raphanus sativus L.) Root and Identification of Genes Involved in Response to Lead (Pb) Stress with Next Generation Sequencing
Source: PLoS One. 2013 Jun 20;8(6):e66539. doi: 10.1371/journal.pone.0066539 (PMC3688795; doi:10.1371/journal.pone.0066539)
Supplement: Table S5 — Primers used for qRT-PCR. (XLS) [file pone.0066539.s005.xls]

## Sheet: Sheet1
Table S5.Primers used for qRT-PCR
	Primer (5’-3’)
>comp7581_c0_seq1	CGTGTTAGTCTGAAGGTT
	CGAAGAAGAGTCCACAAC
>comp7904_c0_seq1	GGAAGAGATAATGATGATGAC
	TACTAGCCTGACGATGAT
>comp13297_c0_seq1	AGAAGAAGTCAGAAGAAGTG
	AGTGTAGAAGAAGTTGGTT
>comp12162_c0_seq1	CATTGTTGAGGTTGAGAAG
	TCTTTGTAAGTTTGCCATAC
>comp25182_c0_seq1	GCAGAACAAGAACAAGAC
	GAGGAACACGGTAAATCT
>comp2023_c0	GTATTGGATTGGAACTGGA
	TCTTCTGTCTCGTTACTTG
>comp2239_c0_seq1	ACTACAATCCTATCCACAAG
	CAATCACCAGAGACTCAG
>comp5087_c0_seq1	CTACGAGAGCAACAACAG
	CAACGGATACACCACATC
>comp5862_c0_seq1	CATCGTAGTCGTCCTCTA
	CTCAGTTGCGTATAGTGTT
>comp1331_c0_seq1	GAAGAGAGAAGAGGATGTG
	AGTTTGAGAGCCATTTCG
>comp2192_c0_seq1	AGGCTATTGCTTATGATTCT
	GTCACTAACTGCTTCCAT
>comp9962_c0_seq1	TATTAGGAACGAAGCAGAG
	GCAGGCATTTGAATCTTT
>comp932_c0_seq1	CGGCAAGACAATAGGATT
	AATACATTCACTCACAACTTC
>comp2560_c0_seq1	GAGGGACATTCACTTTACC
	GAAGACAGATGCCGTATC
>comp942_c0_seq1	TGGCTCTCAAACTCAAAG
	AGATGTGACTCGGCTAAT
>comp674_c0_seq1	CTCGTCTCTGTCTTATTCTT
	GGTGATTCCATCGTTAGT
>comp630_c0_seq1	GTGGGAGAAAGTGATAGG
	ATTGATTGGACCGAAGAA
>comp5751_c0_seq1	TACATCAATCTACAACACCAT
	CAACTCTCCTTTCACTCTC
>comp8656_c0_seq1	CTCACATCTTCACCTTCC
	AACCCAAACCCAACTATG
>comp3052_c0_seq1	GCAGAGAAGATAGAGACAG
	GTGAGAACGAGTATGGTAAT
>comp4226_c0_seq1	AGTATCTTCTTCGTCAGC
	TTAGCCTCAACTTCCATC
>comp5860_c0_seq1	ATGATGTTTGCTGTTGGA
	GAGTCGGTAGATTGAGAAG
>comp1679_c0_seq1	GACGGCATTATACCATCC
	TATCACCACTCCATCATCTT
Actin2/7	GCATCACACTTTCTACAAC
	CCTGGATAGCAACATACAT
